# Supplementary material for: Causal association of physical activity with low back pain, intervertebral disc degeneration and sciatica: a two-sample mendelian randomization analysis study
Source: PubMed Central journal article supplement (PMC10665496; doi:10.3389/fcell.2023.1260001), 2023-11-09
Supplement: DataSheet2.pdf [file DataSheet2.pdf]

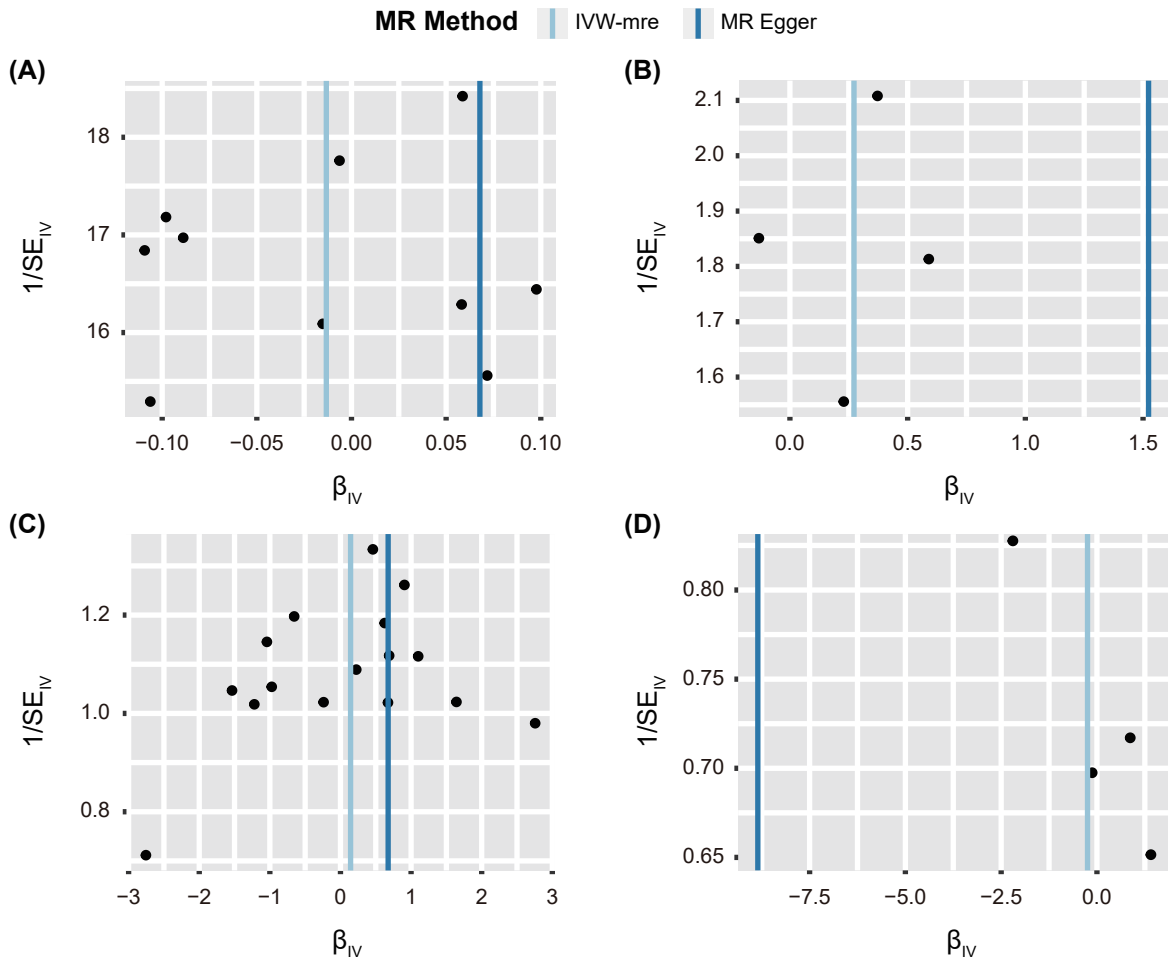

Figure S2: Funnel plots of the genetic associations between PA and IDD. (A) accelerometer-based PA (average acceleration); (B) accelerometer-based PA (acceleration fraction > 425 milligrams); (C) self-reported moderate-to-vigorous PA; (D) self-reported vigorous PA. The light blue line represents the IVW estimate, and the dark blue line represents the MR - Egger estimate. IVW-mre, multiplicative random effects inverse variance weighting.
