# Supplementary material for: Causal association of physical activity with low back pain, intervertebral disc degeneration and sciatica: a two-sample mendelian randomization analysis study
Source: PubMed Central journal article supplement (PMC10665496; doi:10.3389/fcell.2023.1260001), 2023-11-09
Supplement: DataSheet9.pdf [file DataSheet9.pdf]

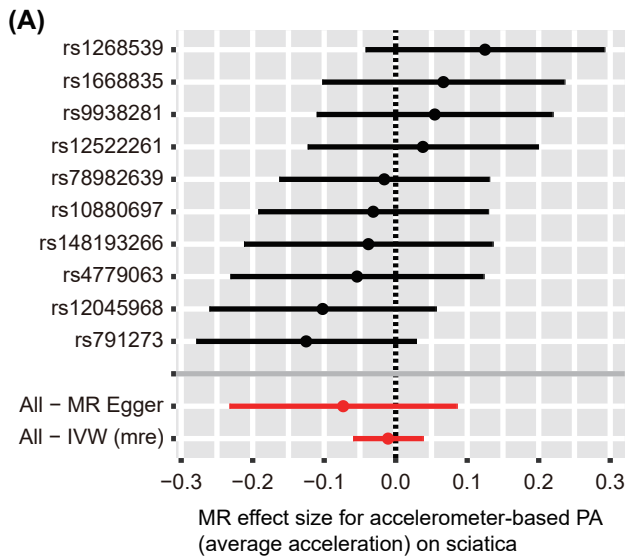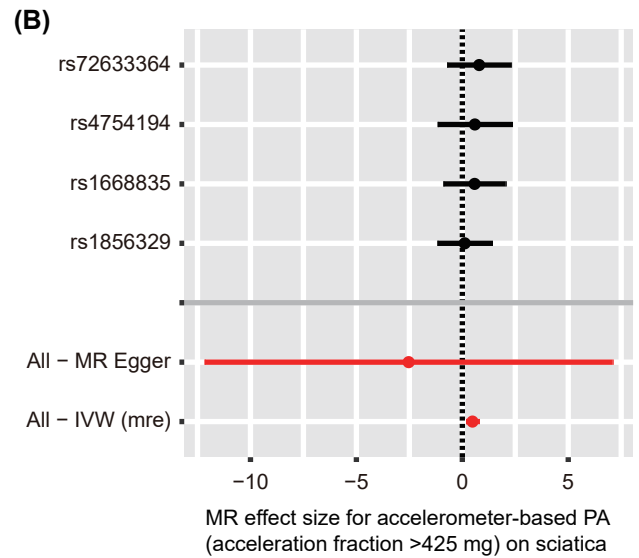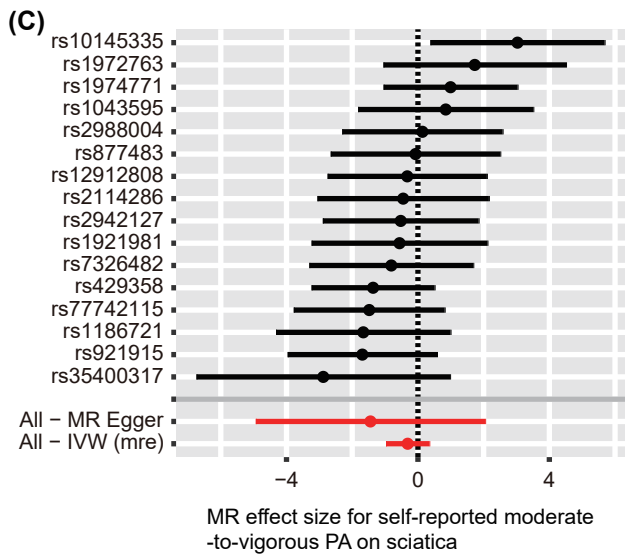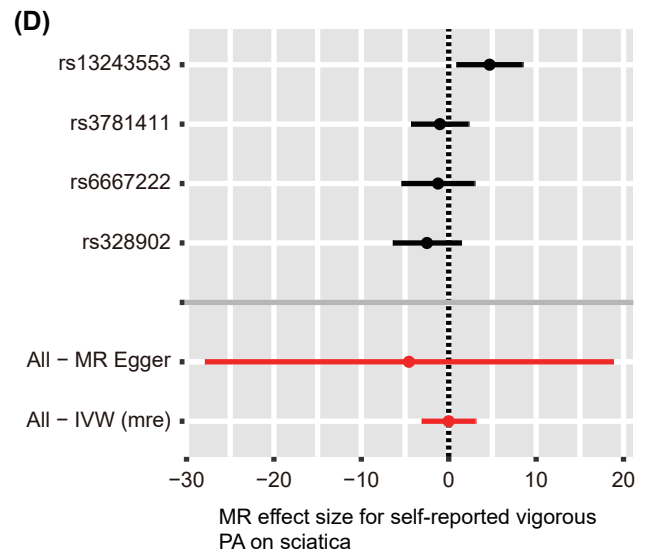

Figure S9: Forest plot for MR analyses of the causal effect of PA on sciatica. (A) accelerometer-based PA (average acceleration); (B) accelerometer-based PA (acceleration fraction > 425 milligrams); (C) self-reported moderate-to-vigorous PA; (D) self-reported vigorous PA. Analyses were conducted using the conventional IVW, MR-Egger. The dot and bar indicate the causal estimate of PA on the risk of sciatica. IVW (mre), multiplicative random effects inverse variance weighting.
